# Epigenetic Regulation of Myogenic Gene Expression by Heterochromatin Protein 1 Alpha

Patima Sdek, Kyohei Oyama, Ekaterini Angelis, Shing S. Chan, Katja Schenke-Layland<sup>‡</sup>, W. Robb MacLellan\*

Departments of Medicine/Cardiology, Center for Cardiovascular Biology, Institute for Stem Cell Research, University of Washington School of Medicine, Seattle, Washington, United States of America

## Abstract

Heterochromatin protein 1 (HP1) is an essential heterochromatin-associated protein typically involved in the epigenetic regulation of gene silencing. However, recent reports have demonstrated that HP1 can also activate gene expression in certain contexts including differentiation. To explore the role of each of the three mammalian HP1 family members ( $\alpha$ ,  $\beta$  and  $\gamma$ ) in skeletal muscle, their expression was individually disrupted in differentiating skeletal myocytes. Among the three isoforms of HP1, HP1 $\alpha$  was specifically required for myogenic gene expression in myoblasts only. Knockdown of HP1 $\alpha$  led to a defect in transcription of skeletal muscle-specific genes including Lbx1, MyoD and myogenin. HP1 $\alpha$  binds to the genomic region of myogenic genes and depletion of HP1 $\alpha$  results in a paradoxical increase in histone H3 lysine 9 trimethylation (H3K9me3) at these sites. JHDM3A, a H3K9 demethylase also binds to myogenic gene's genomic regions in myoblasts in a HP1 $\alpha$ -dependent manner. JHDM3A interacts with HP1 $\alpha$  and knockdown of JHDM3A in myoblasts recapitulates the decreased myogenic gene transcription seen with HP1 $\alpha$  depletion. These results propose a novel mechanism for HP1 $\alpha$ -dependent gene activation by interacting with the demethylase JHDM3A and that HP1 $\alpha$  is required for maintenance of myogenic gene expression in myoblasts.

**Citation:** Sdek P, Oyama K, Angelis E, Chan SS, Schenke-Layland K, et al. (2013) Epigenetic Regulation of Myogenic Gene Expression by Heterochromatin Protein 1 Alpha. PLoS ONE 8(3): e58319. doi:10.1371/journal.pone.0058319

**Editor:** Janet F. Partridge, St Jude Children's Research Hospital, United States of America

**Received:** October 8, 2012; **Accepted:** February 2, 2013; **Published:** March 11, 2013

**Copyright:** © 2013 Sdek et al. This is an open-access article distributed under the terms of the Creative Commons Attribution License, which permits unrestricted use, distribution, and reproduction in any medium, provided the original author and source are credited.

**Funding:** This work was supported by a grant from the NIH R01 HL70748 to WRM. The funders had no role in study design, data collection and analysis, decision to publish, or preparation of the manuscript.

**Competing Interests:** The authors have declared that no competing interests exist.

\* E-mail: WRMacLellan@cardiology.washington.edu

‡ Current address: Department of Thoracic and Cardiovascular Surgery, Eberhard Karls University Tübingen, Tübingen, Germany

## Introduction

Skeletal muscle differentiation is a multistep process which begins with the commitment of multi-potent mesodermal precursor cells to the muscle fate and culminates with the upregulation of skeletal muscle-specific genes, permanent cell cycle withdrawal and silencing of genes required for cell cycle progression in myotubes [1,2,3]. The muscle regulatory factors that drive myogenic differentiation have been well studied; however, the mechanisms that control their expression are poorly understood. It has been suggested that epigenetic regulation and post-translation modifications of histones in particular play a critical role in skeletal muscle differentiation [4,5].

HP1s are a family of essential heterochromatin-associated proteins that recognize methylated histones and classically play a role in the organization of heterochromatin formation and gene silencing in many organisms [6]. Mammalian cells contain three HP1 isoforms: HP1 $\alpha$ , HP1 $\beta$  and HP1 $\gamma$ , which differ in localization and interaction partners and thus likely have distinct cellular functions [7,8]. The mechanism of HP1-dependent gene silencing has been extensively studied and occurs via the formation of heterochromatin at hetero- and euchromatic promoters. Conversely, recent reports indicate that HP1 can also activate euchromatic and heterochromatic gene expression in certain situations [9,10,11]. The mechanism of HP1-dependent gene

expression activation remains largely unclear but in contrast to its association with promoters when silencing genes, HP1 can associate anywhere within the genomic sequences when activating gene expression.

The role of HP1 family members during differentiation including skeletal muscle has had limited investigation [12,13,14,15,16,17]. Recent reports, based primarily on heterologous systems, suggest that HP1 proteins might negatively regulate skeletal muscle differentiation by inhibiting skeletal muscle-specific factors, MEF2 and MyoD in myoblasts [12,16]. However, when endogenous HP1 expression was depleted, instead of activating MyoD-dependent genes, skeletal muscle differentiation was inhibited [16]. The basis for this paradox was not resolved; however, it was postulated that it might be an indirect effect related to a failure to downregulate proliferation-associated genes although this was not shown.

In order to explore the mechanism(s) underlying the dual functions of HP1 in skeletal muscle differentiation, we disrupted the expression of each HP1 family member in differentiating skeletal myocytes. Among the three isoforms of HP1, HP1 $\alpha$  was specifically required for myogenic differentiation and blocking its expression led to a defect in the transcription of skeletal muscle-specific genes including Lbx1, MyoD and myogenin. This defect was not secondary to aberrant expression of cell cycle-associated genes. Instead, HP1 $\alpha$  appears to regulate H3K9me3 demethyla-

tion of target myogenic genes by interacting with the histone demethylase JHDM3A thus facilitating gene expression. Therefore, our results suggest a bifunctional role for HP1 $\alpha$  in skeletal myoblasts designed to maintain their committed but undifferentiated state. This study suggests a novel mechanism for HP1 $\alpha$ -dependent myogenic gene expression.

## Results

### Expression and Nuclear Distribution of HP1 Proteins during Skeletal Muscle Differentiation

To explore the role of HP1s in regulating skeletal muscle differentiation, we examined HP1 protein expression at serial time points during differentiation of C2C12 cells, a clonal skeletal myoblast cell line. All three HP1 family members were expressed in skeletal muscle although their developmental pattern of expression differed. HP1 $\alpha$  and HP1 $\gamma$  displayed a similar biphasic expression pattern; namely, downregulation upon initiation of differentiation with subsequent upregulation in myotubes. In contrast, HP1 $\beta$  protein levels were low in myoblasts but were upregulated in myotubes (Fig. 1A). As expected, myotubes demonstrated increased myogenin expression. To determine the nuclear distribution of HP1 proteins, we examined myoblasts and myotubes with antibodies to HP1 proteins and imaged the nuclear DNA with DAPI (Fig. 1B, Fig. S1). It has been suggested that pericentric heterochromatin aggregates develop during myogenic differentiation, which can be identified by concentrated DAPI staining [18,19]. Heterochromatin aggregates increased dramatically in myotubes although limited, small dense chromatin areas are also apparent in myoblasts (Fig. 1B). In myoblasts, HP1 $\alpha$  and HP1 $\beta$  were distributed throughout both lighter stained euchromatic regions and densely stained heterochromatic areas while HP1 $\gamma$  was exclusively localized to euchromatin. However, all HP1 family members colocalized with heterochromatin in differentiated myotubes. These differing temporal and subnuclear expression patterns suggest that the function of HP1 isoforms may differ not only between family members but also on the developmental time point.

### Knockdown of HP1 $\alpha$ , but not HP1 $\beta$ and HP1 $\gamma$ , Blocks Skeletal Muscle Differentiation

To determine the effects of depleting HP1 family members on skeletal muscle differentiation, we inhibited HP1 expression with oligonucleotide siRNAs to each of the individual HP1 family members (HP1 $\alpha$ , - $\beta$  and - $\gamma$ ). Myoblasts were transfected with each specific HP1 siRNA, after which myotube formation or myogenic gene expression was examined after 72 hours of culturing in differentiation media (DM). Phase contrast images of C2C12 cells show that cells transfected with nonspecific siRNA (NSsiRNA) as well as cells transfected with HP1 $\beta$  and HP1 $\gamma$  siRNA formed myotubes normally (Fig. 2A a, c, d); however, myotube formation was absent in cells deficient for HP1 $\alpha$  (Fig. 2A b). Expression of skeletal sarcomeric  $\alpha$ -actinin, a marker of differentiation, and heterochromatin aggregation was dramatically impaired in HP1 $\alpha$  deficient cells compared to NSsiRNA transfected cells (Fig. 2A–f vs. e). HP1 $\alpha$ , - $\beta$  and - $\gamma$  were efficiently and specifically knocked down, myogenin and  $\alpha$ -skeletal actin expression was blocked exclusively in HP1 $\alpha$  depleted myocytes (Fig. 2B). To ensure that the effect of depleting HP1 $\alpha$  on myoblast differentiation was specific, we confirmed these results using a second independent siRNA having different target sequences within HP1 $\alpha$ . Both siRNAs efficiently reduced the level of HP1 $\alpha$ , leading to marked reductions in myogenin levels and impaired differentiation (Fig. 2C).

To further confirm the specificity of the effect of depleting HP1 $\alpha$  on skeletal muscle differentiation, we determined if the defect in differentiation could be rescued by re-introducing HP1 $\alpha$ . We generated a siRNA-resistant GFP-HP1 $\alpha$  fusion protein (GFP-rHP1 $\alpha$ ) by mutating four nucleotides in the HP1 $\alpha$ siRNA target sequence that conserved the amino acid sequence. Relative expression of GFP and GFP-rHP1 $\alpha$  fusion protein are demonstrated by immunostaining and Western blotting (Fig. 2D & E). siRNA oligonucleotides and GFP expressing plasmids (GFP or GFP-rHP1 $\alpha$ ) were co-transfected in C2C12 myoblasts and the cells were induced to differentiate. Differentiated cells were identified by Troponin C immunostaining (Fig. 2D). The percentage of Troponin C positive cells in GFP-rHP1 $\alpha$  expressing cells was significantly higher as compared to GFP-only cells (60% vs. 22%,  $P=0.007$ ; Fig. 2E). These data demonstrate that HP1 $\alpha$  is specifically required for skeletal muscle differentiation.

### HP1 $\alpha$ -deficient Myocytes Demonstrate a Defect at the Committed Myoblast Stage with Reduced Myogenic Gene Expression

To determine the basis for the defect in myogenic differentiation created by HP1 $\alpha$  deficiency, transcript levels of a panel of genes involved in myogenic differentiation were examined after HP1 $\alpha$ siRNA transfection in C2C12 cells (Fig. 3A, B, C). Transcript levels of Pax7 and Myf-5 were minimally affected after HP1 $\alpha$  knockdown while Lbx1, MyoD, MEF2C and myogenin levels were markedly decreased (Fig. 3A and B). Expression of Mxsl1, which is known to inhibit skeletal muscle differentiation through repression of myogenic genes including MyoD [20] was not altered significantly in HP1 $\alpha$ -deficient myoblasts. It has been proposed that the myogenic defect caused by depletion of HP1 $\alpha$  might related to a failure to downregulate proliferation-associated genes [16], which is necessary for cell cycle exit during terminal differentiation. In contrast to this hypothesis, we detected a slight downregulation, not upregulation of E2F-dependent target genes after depleting HP1 $\alpha$  (Fig. 3C). To further clarify the effect of depleting HP1 $\alpha$  on cell proliferation, we assayed DNA synthesis using a novel thymidine analogue, 5-Ethynyl-2'-deoxyuridine (EDU). C2C12 myoblasts transfected with NSsiRNA showed 51% of the cells incorporated EDU while depletion of HP1 $\alpha$  decreased the number of EDU-labeled cells to 46% (Fig. 3D & Fig. S2). This finding is consistent with expression levels of E2F-dependent genes in HP1 $\alpha$  knockdown cells and confirms that the defect in myogenic differentiation observed in HP1 deficient cells is not a result of persistent expression of proliferation-associated genes. Consistent with our earlier results, C2C12 cells deficient for HP1 $\beta$  and - $\gamma$  expressed normal levels of myogenic genes (Fig. 3E). This defect in myogenic gene expression could be rescued by restoring HP1 $\alpha$  expression. GFP or the siRNA-resistant GFP-rHP1 $\alpha$  fusion protein was overexpressed in HP1 $\alpha$ siRNA transfected cells and GFP-positive cells were isolated by fluorescence-activated cell sorting (Fig. S3). Lbx1 and MyoD mRNA levels were upregulated in GFP-rHP1 $\alpha$  expressing cells compared to GFP-only expressing cells (Fig. 3F). These data suggest the effect of HP1 $\alpha$  on skeletal muscle differentiation might be secondary to the direct regulation of myogenic gene transcription.

### HP1 $\alpha$ is Dispensable for Myogenic Gene Expression and Maintenance of Terminal Differentiation in Myotubes

Although our results demonstrate a critical role for HP1 $\alpha$  in myoblast gene transcription, its role in myotubes was uncertain. The fact that HP1 $\alpha$  is expressed and colocalizes with heterochromatin in myotubes (Fig. 1B & Fig. S1) suggested it might have

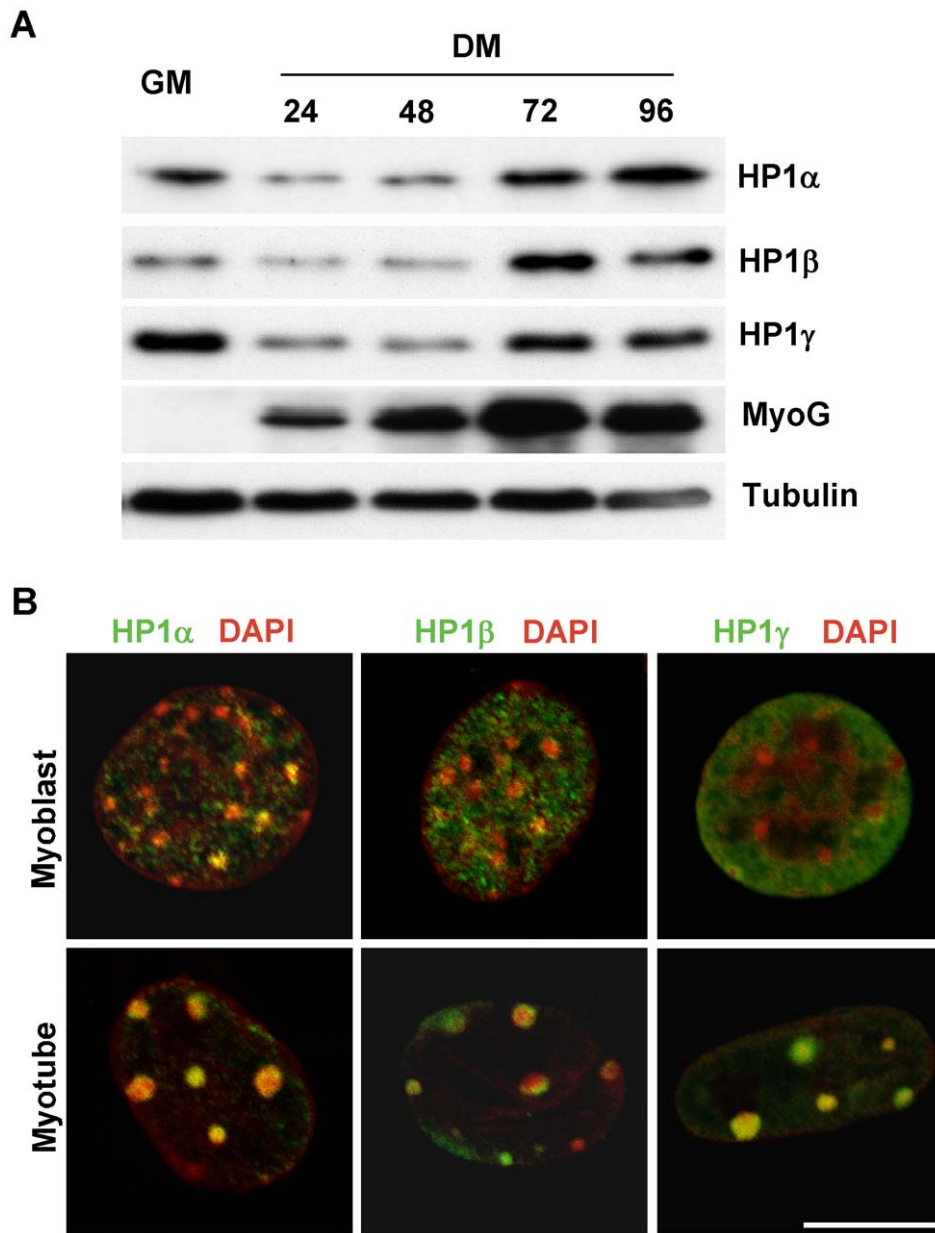

**Figure 1. Expression and nuclear distribution of HP1 proteins during skeletal muscle differentiation.** A. C2C12 cells were cultured in GM (growth medium) or DM (differentiation medium) and collected at indicated time points. Total protein was extracted and subjected to Western blotting. B. Confocal fluorescence microscopy was performed on C2C12 myoblasts and myotubes after immunostaining for the indicated HP1 protein (green) and DAPI (converted to red). Scale bar equals 10  $\mu$ m. doi:10.1371/journal.pone.0058319.g001

a distinct role at this developmental time point. Thus, to investigate the effect of HP1 $\alpha$  on myogenic and E2F-dependent gene expression in myotubes, we inhibited HP1 $\alpha$  expression specifically in myotubes, bypassing the defect elicited in myoblasts. The transfection efficiency of oligonucleotide siRNA in myotubes was greater than 95% when tested by using CY3-labeled siRNA (data not shown). HP1 $\alpha$ siRNA, even when delivered after myocyte differentiation, efficiently reduced HP1 $\alpha$  RNA and protein levels (Fig. 4A & B); however, Lbx1 and MyoD expression were not downregulated as was seen in myoblasts (Fig. 4A) nor were the levels of late markers of myogenic differentiation such as myogenin or p21 affected (Fig. 4B). Likewise, there were no significant changes in expression of cell cycle associated factors Cyclin E and

E2F1 (Fig. 4A). To determine if HP1 $\alpha$  was required for the maintenance of the terminally differentiated state, siRNA transfected myotubes were stimulated with 20% FBS for 24 hours in the presence of BrdU to label myotubes entering S phase. No increase in BrdU-labeled myotubes was seen after serum stimulation suggesting that HP1 $\alpha$ -depleted myotubes were not capable of reentering the cell cycle (Fig. 4C).

#### Histone Lysine 9 Trimethylation (H3K9me3) in Myogenic Gene Coding Regions is Increased after Depleting HP1 $\alpha$

It has been suggested that HP1 can associate anywhere within genomic sequences when activating gene expression. To clarify the mechanism underlying the altered expression of myogenic

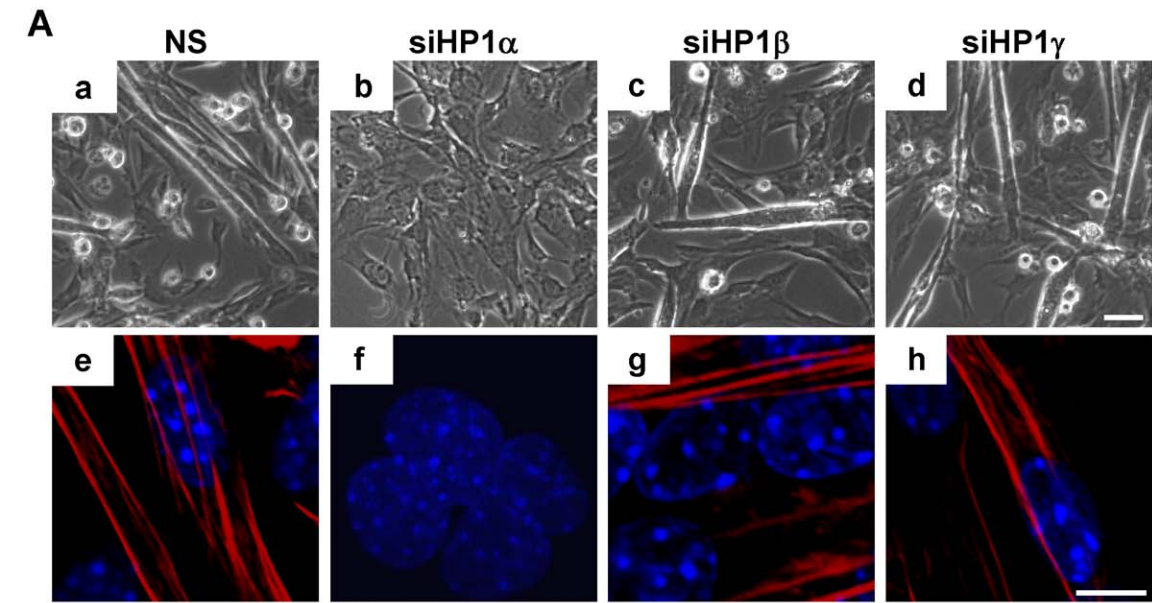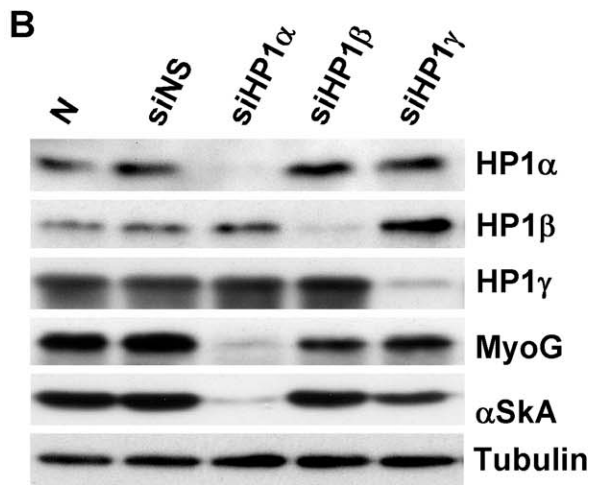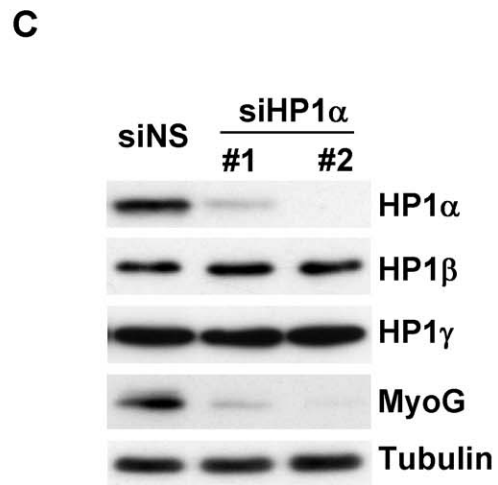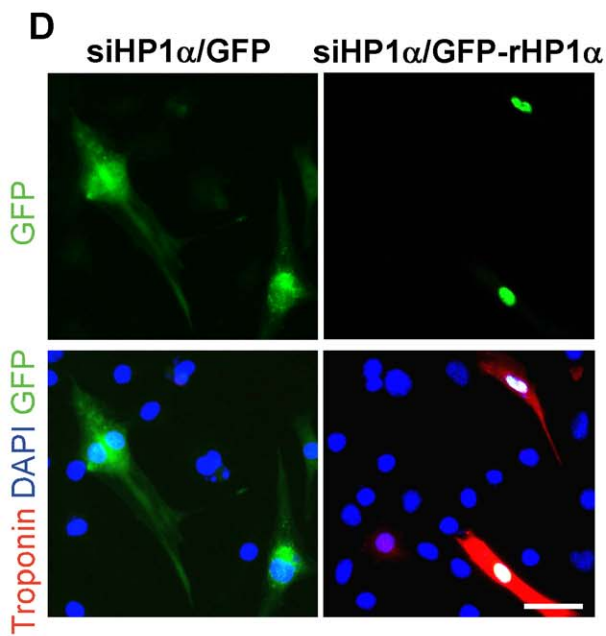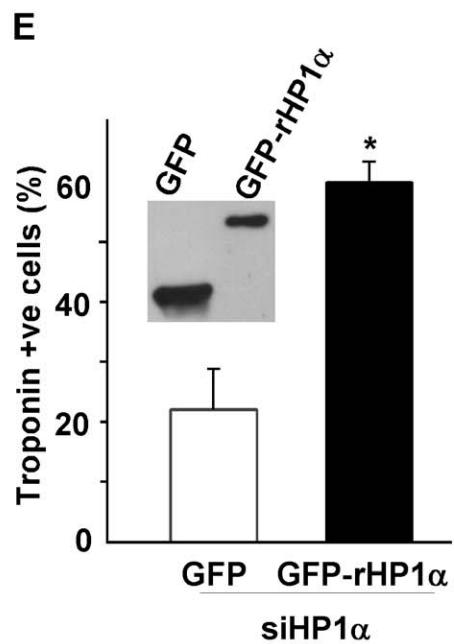

**Figure 2. HP1 $\alpha$  is required for skeletal muscle differentiation.** C2C12 cells were transfected with the indicated siRNA in GM and 24 hours after transfection, DM was added and cultured for 72 hours. A. Phase contrast images were obtained (A a–d). Confocal fluorescence microscopy was performed after immunostaining for skeletal sarcomeric myosin heavy chain (red) and DAPI (blue) (A e–h). Scale bar equals 50  $\mu$ m (A a–d) and 6  $\mu$ m (A e–h). B. Total protein lysates were subjected to Western blotting. C. C2C12 cells were transfected with NSsiRNA or HP1 $\alpha$ siRNA (#1: ID# 60593; #2: ID# 60497) and cultured in DM for 72 hours. Total protein lysates were subjected to Western blotting. D. Reintroduction of siRNA resistant version of HP1 $\alpha$  rescued myogenic differentiation in HP1 $\alpha$ siRNA transfected cells. C2C12 myoblasts were co-transfected with the indicated siRNA and pLPC-EHGf or pLPC-EHGf-rHP1 $\alpha$  plasmids. 24 hours after transfection, DM was added and cultured for another 72 hours. Cells were stained with anti-GFP (green) and anti-Troponin C (red), nuclei were counterstained with DAPI (blue). Scale bar equals 50  $\mu$ m. E. The total number of GFP positive cells and the cells positive for both GFP and Troponin C were counted and percentage of Troponin C positive cells in GFP positive cells were calculated. \* $P$ <0.01 for siHP1 $\alpha$ /GFP versus siHP1 $\alpha$ /GFP-rHP1 $\alpha$  cells. Expression of GFP and GFP fusion HP1 were detected by Western blotting using anti-GFP antibody.  
doi:10.1371/journal.pone.0058319.g002

regulatory genes in HP1 $\alpha$  depleted myocytes, we examined if HP1 $\alpha$  directly associates with the genomic sequences of *Lbx1*. *Lbx1* plays a critical role in hypaxial muscle development [21,22]. It has been reported that *Lbx1* functions upstream of MyoD [23] and is thus the earliest myogenic gene whose expression is altered by HP1 $\alpha$ -deficiency. We performed ChIP assays using primers that span the entire *Lbx1* genomic sequence including putative promoter, exons and intronic regions (Fig. 5A). Primers within the promoter of the *Col11a2* gene, a known HP1 $\alpha$  target, were used as a positive control [24]. As shown in Figure 5B, endogenous HP1 $\alpha$  binds preferably to exon 2 of *Lbx1* in myoblasts while the binding of HP1 $\alpha$  to the other genomic sequences of *Lbx1* was undetectable. HP1 has been shown to stimulate gene expression in *Drosophila* and these HP1-induced target genes were marked by the presence of dimethylated histone 3 lysine 4 (H3K4me<sub>2</sub>), which is found, along with histone acetylation (H3K9Ac), on active chromatin [25]. To determine the effects of HP1 $\alpha$  depletion on histone modifications present on *Lbx1* exon 2, we examined the status of H3K9Ac and H3K4me<sub>2</sub> in C2C12 myoblasts transfected with NSsiRNA and HP1 $\alpha$ siRNA. Surprisingly, there were no significant changes in levels of H3K4me<sub>2</sub> or H3K9Ac, however, levels of H3K9me<sub>3</sub>, typically associated with gene silencing were increased by 59% in HP1 $\alpha$  depleted myoblasts as compared to control cells (Fig. 5C and Fig. S4A  $P$ <0.01). This effect was specific to exon 2 as H3K9me<sub>3</sub> in exon 1 or the intronic region was unchanged (Fig. 5D). These data suggest that HP1 $\alpha$  paradoxically might be mediating demethylation of H3K9me<sub>3</sub> within exon 2 of *Lbx1* in myoblasts.

To investigate if the effect of HP1 $\alpha$  on H3K9me<sub>3</sub> is specific to the *Lbx1* gene or possibly a more general effect, we compared the levels of total H3K9me<sub>3</sub> in C2C12 myoblasts transfected with NSsiRNA and HP1 $\alpha$ siRNA. HP1 $\alpha$  deficient cells have higher levels of H3K9me<sub>3</sub> (Fig. 5E), suggesting that HP1 $\alpha$  regulates global H3K9me<sub>3</sub> in myoblasts. Consistent with the downregulation of myogenin expression after knockdown of HP1 $\alpha$ , H3K9me<sub>3</sub> levels at the myogenin promoter were higher in HP1 $\alpha$ siRNA transfected myoblasts compared to NSsiRNA transfected cells (Fig. 5F).

### HP1 $\alpha$ Promotes Myogenic Gene Expression via Interacting with the Histone Demethylase JHDM3A

It has been recently reported that the mammalian demethylase, JHDM3A, is capable of removing the me<sub>3</sub> group from modified H3K9 and H3K36 [26,27,28]. To determine if an interaction between HP1 $\alpha$  and JHDM3A might account for HP1 $\alpha$ 's paradoxical effect on transcription and methylation of myogenic genes, we examined whether JHDM3A could also associate with these genes in myoblasts. ChIP assays performed on myoblasts transfected with either NSsiRNA or HP1 $\alpha$ siRNA demonstrated that endogenous JHDM3A is also present at the *Lbx1* exon 2 and myogenin promoter, and that this association is impaired in HP1 $\alpha$  deficient cells (Fig. 6A and Fig. S4B). The impairment of

JHDM3A binding was not due to decreased protein levels in HP1 $\alpha$  depleted cells (Fig. 6B). To ascertain if JHDM3A associates with HP1 $\alpha$ , we overexpressed Flag-JHDM3A and GFP-HP1 $\alpha$  in NIH3T3 cells and immunoprecipitated the resultant lysates with either anti-Flag (Fig. 6C) or anti-GFP antibodies (Fig. 6D). Western blotting of the precipitated complexes with anti-HP1 $\alpha$  or anti-JHDM3A antibodies revealed that JHDM3A associates with HP1 $\alpha$ . Co-immunoprecipitation analyses on lysates prepared from unmodified C2C12 cells confirmed that endogenous HP1 $\alpha$  and JHDM3A can also associate *in vivo* (Fig. 6E and F). We further confirmed HP1 $\alpha$ -JHDM3A interaction using *in vitro* binding assays. *In vitro* translated <sup>35</sup>S-methionine-labeled JHDM3A interacted with a recombinant GST-HP1 $\alpha$  fusion protein (Fig. 6G). If HP1 $\alpha$  recruitment of JHDM3A to *Lbx1* exon 2 were required for efficient gene expression we would expect that depletion of JHDM3A in myoblasts would recapitulate the effects of HP1 $\alpha$  deficiency, at least on *Lbx1*, *MyoD* and myogenin transcription. C2C12 cells were transfected with JHDM3AsiRNA and knock-down efficiency was confirmed by examining JHDM3A mRNA levels by RT-PCR (Fig. 6H). Consistent with the effect of depleting HP1 $\alpha$  on myogenic gene expression, JHDM3A depletion led to a marked reduction in *Lbx1*, *MyoD* and myogenin transcript levels in myoblasts (Fig. 6H), which subsequently normalized with differentiation (Fig. S5A). We did not detect significant change of mRNA levels of Pax7 and Myf5 in JHDM3A knockdown cells (Fig. 6H). We further examined the H3K9me<sub>3</sub> status on exon 2 of *Lbx1* and detected higher levels of H3K9me<sub>3</sub> in JHDM3AsiRNA transfected myoblasts compared to NSsiRNA transfected cells (Fig. 6I). Knockdown of JHDM3A did not affect HP1 $\alpha$  expression (Fig. 6J). Taken together, these results support a model whereby HP1 $\alpha$  facilitates early myogenic gene expression in myoblasts through recruitment of JHDM3A to target genes.

### Discussion

In this study, we demonstrated that among the three isoforms of HP1, HP1 $\alpha$  was specifically required for myogenic gene expression in myoblasts. Superficially, this data appears at odds with recent reports that demonstrated HP1 proteins negatively regulate the transcriptional activity of MyoD and MEF2C [12,16]; however, HP1's effect on endogenous myogenic genes was not examined in these studies. Instead, consistent with our results, it was reported that down-regulation of HP1 $\alpha$  impaired differentiation. The molecular basis for this paradox was postulated that this effect related to a loss of HP1 $\alpha$ -dependent suppression on expression of proliferation-associated genes [16]. We did not detect significant upregulation of E2F-dependent target genes after depletion of HP1 $\alpha$  in C2C12 myoblasts, thus failure to down-regulate proliferation associated genes could not account for this finding. In contrast, depletion of HP1 $\alpha$  blocked expression of myogenic genes even before differentiation induction (Fig. 2C). The defect in skeletal muscle differentiation in HP1 $\alpha$ -depleted

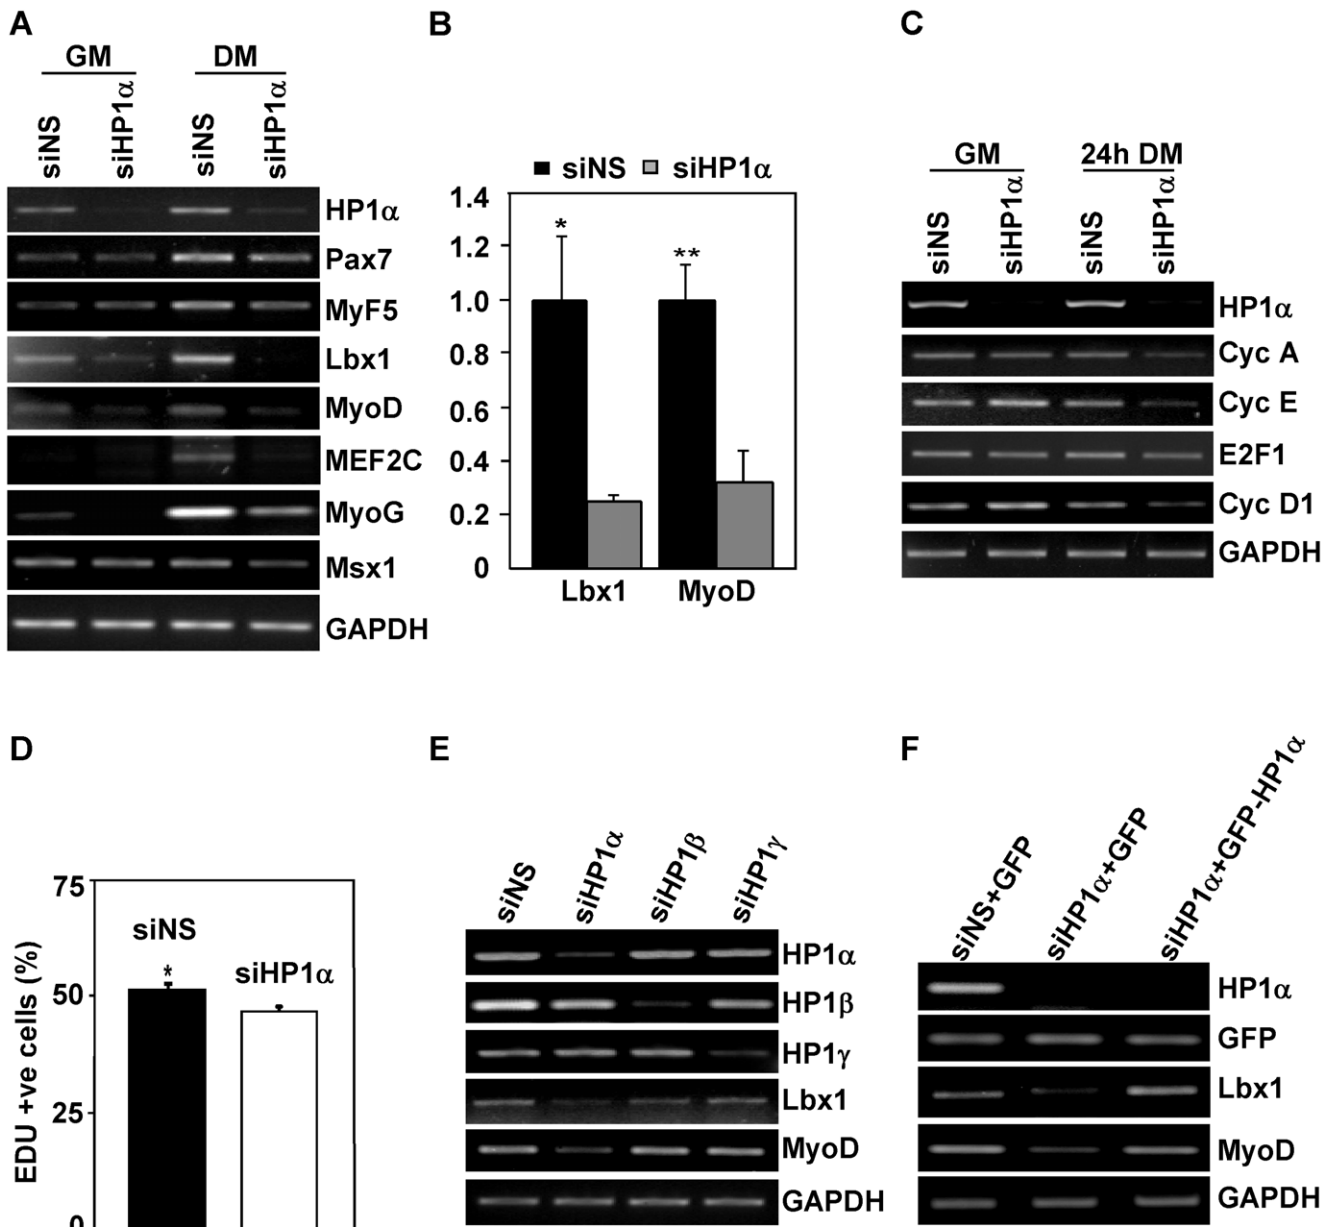

Fig. 3 Sdek et al

**Figure 3. HP1 $\alpha$ -deficient myocytes demonstrate a defect at the committed myoblast stage with reduced Lbx and MyoD expression.** A, B, C. C2C12 myoblasts were transfected with indicated siRNA. 24 hours after transfection, transfection medium were changed to GM or DM, cells were incubated for an additional 24 hours. Total RNA was isolated and semiquantitative PCR analysis of gene expression was performed (A, C). mRNA levels of Lbx1 and MyoD (B) in cells cultured in GM quantified by real-time PCR normalized to GAPDH. \* $P < 0.05$  for Lbx1 levels siNS vs. siHP1 $\alpha$ ; \*\* $P < 0.05$  for MyoD levels siNS vs. siHP1 $\alpha$ . D. EDU assay were performed 24 hours after indicated siRNA transfection in C2C12 myoblasts. Percentage of EDU positive cells was calculated. \* $P < 0.05$  for sins versus siHP1 $\alpha$ . E. C2C12 cells were transfected with indicated siRNA. Total RNA was isolated 36 hours after transfection. Semiquantitative PCR analysis of gene expression was performed. F. C2C12 myoblasts were co-transfected with indicated siRNA and GFP-expressing plasmid. Total RNA was extracted from GFP-positive cells isolated by fluorescence-activated cell sorting (FACS). Semiquantitative PCR analysis of gene expression was performed. doi:10.1371/journal.pone.0058319.g003

myoblasts was accompanied by reduced Lbx1, MyoD, MEF2C and myogenin expression without significantly effecting Pax7 or Myf5. Reduction in expression of these key regulators of myogenesis is likely sufficient to account for the subsequent defect in myogenic differentiation we observed. This dependence of skeletal muscle differentiation was specific to myoblasts since no defect was seen when HP1 $\alpha$  was knockdown in myotubes. This

data is reminiscent of recent studies exploring Rb's role in skeletal muscle differentiation, where Rb is critical for progression through myogenic differentiation [29,30,31] but is dispensable for the maintenance of the terminally differentiated state [32,33]. Although our study demonstrates that HP1 $\alpha$  is dispensable for maintenance of terminal differentiation, whether this implies HP1 $\alpha$  has no role in myotubes or whether HP1 $\beta$  and  $\gamma$ , which are

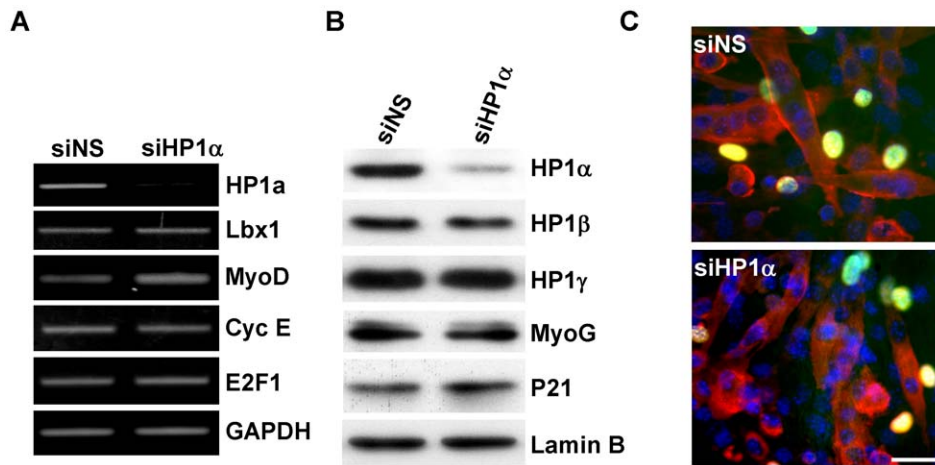

**Figure 4. HP1 $\alpha$  is dispensable for maintenance of terminal differentiation.** C2C12 cells were cultured in DM for 72 hours and then transfected with indicated siRNA. **A**, 48 hours after transfection, total RNA was isolated and semiquantitative PCR analysis of gene expression was performed. **B**, 24 hours after siRNA transfection, DMEM contain 20% FBS were added and cells were cultured for another 24 hours. Total protein were extracted and probed for indicated antibodies. **C**, 24 hours after siRNA transfection, cells were stimulated with DMEM contain 20% FBS in the presence of BrdU for 24 hours. Cell cycle reentry was determined by immunostaining for BrdU incorporation (Blue: DAPI, Red: sarcomeric myosin heavy chain; Green; BrdU). Scale bar equals 50  $\mu$ m. doi:10.1371/journal.pone.0058319.g004

expressed normally in HP1 $\alpha$  deficient myotubes, compensate for HP1 $\alpha$ 's function will need to be determined. Although over-expression of a siRNA resistant HP1 $\alpha$  was able to rescue the defect in myogenic gene expression in transfected cells there was a persistent defect in myotube formation (Fig. 2). Although we achieved very high transfection efficiency (>90%) for siRNA in C2C12 cells, the transfection efficiency of pLPC-EHGF-rHP1 alpha in C2C12 is low but consistent with published transient transfection rates in these cells [34]. Thus, we can not determine if the defect in myotube formation is related to the expected low rate of rescue due to low transient transfection efficiency, high levels of HP1 $\alpha$  expression by transfected construct versus a true physiologic difference.

Although HP1's ability to silence gene transcription is well documented, few examples exist of its ability to activate gene expression in mammalian cells and little is known regarding the possible mechanisms. However, it was known that when activating gene expression HP1 can associate anywhere within genomic sequences [9]. It has been recently demonstrated that Pax7 activates Myf5 expression by recruitment of a histone methyltransferase complex to Myf5 coding regions [35]. However HP1 $\alpha$ 's function on transcription activation appeared independent of histone acetyltransferases and methyltransferase since there was no discernable change in the level of H3K9Ac and H3K4me2 after knockdown of HP1 $\alpha$  expression. Instead, we found total H3K9me3 levels increased after knockdown of HP1 $\alpha$  either in promoter or transcribed regions generally is associated with gene silencing [36]. Depleting HP1 $\alpha$  decreased Lbx1 expression in C2C12 myoblasts correlating with increased H3K9me3 on Lbx1 exon 2. This appears to be a direct effect since HP1 $\alpha$  binds directly to this same region of Lbx1. Interestingly, despite previous reports that HP1 $\alpha$  interacted with MEF2C to inhibit myogenin expression, depleting HP1 $\alpha$  resulted in decreased endogenous myogenin expression, which was associated with a higher level of H3K9me3 at the myogenin promoter. These results suggest that HP1 $\alpha$  might be promoting demethylation of H3K9me3 at myogenic promoters.

Recent studies have identified a family of JmjC domain-containing proteins that possess histone demethylation activity and

facilitate transcription activation [26,27,28]. We were able to demonstrate an association of JHDM3A with genomic sequence of Lbx1 and myogenin and this interaction was HP1 $\alpha$ -dependent. JHDM3A, also known as JMJD2A, is a JmjC domain-containing protein that possesses histone demethylation activity, which specifically demethylates tri- and di- methylation of H3K9 [26,27]. We demonstrated that JHDM3A interacts with HP1 $\alpha$  and the effects of JHDM3A knockdown on myogenic gene transcription were similar to HP1 $\alpha$  deficiency. These results suggest that HP1 $\alpha$  recruits JHDM3A to transcriptional regions of Lbx1, demethylating H3K9me3, and facilitating transcription to promote myogenic differentiation. However, knockdown of JHDM3A delayed myogenic gene expression but did not block C2C12 differentiation completely (Fig. S5 and data not shown). Several possible explanations exist for this observation. JHDM3A may be critical early for myogenic gene transcription but other mechanisms predominate later in skeletal differentiation. Alternatively, there are other demethylase(s) that can compensate for the lack of JHDM3A function in differentiating myocytes. JHDM3A along with JMJD2B, C and D belong to the JmjC domain-family of histone demethylase. JHDM3A, JMJD2C and JMJD2D are all capable of demethylating tri-methylated H3K9 [17]. Although we did not detect JMJD2D in C2C12 cells, JMJD2C is expressed in C2C12 cells and knockdown of JHDM3A with siRNA did not affect JMJD2C expression.

Methylation of H3K9 has been strongly implicated in HP1 recruitment and formation of heterochromatin [28]. Thus, the interaction of HP1 with histone deacetylases and methyltransferases has been well studied [12,37]. However, there is little data related to the interaction of HP1 with demethylases in mammalian cells. It has been reported that Swi6, a homolog of HP1 in yeast, recruits Epe1, a JmjC domain protein, to heterochromatin loci to facilitate transcription [38]. Recently Lin et al [39] reported that HP1 $\alpha$  specifically interact with the Drosophila KDM4A demethylase and stimulates histone H3 lysine 36 demethylation. Our study is the first to suggest that similar interaction between HP1 $\alpha$  and the demethylase JHDM3A occur in mammalian cells, suggesting a new paradigm for the regulation of tissue-specific gene expression.

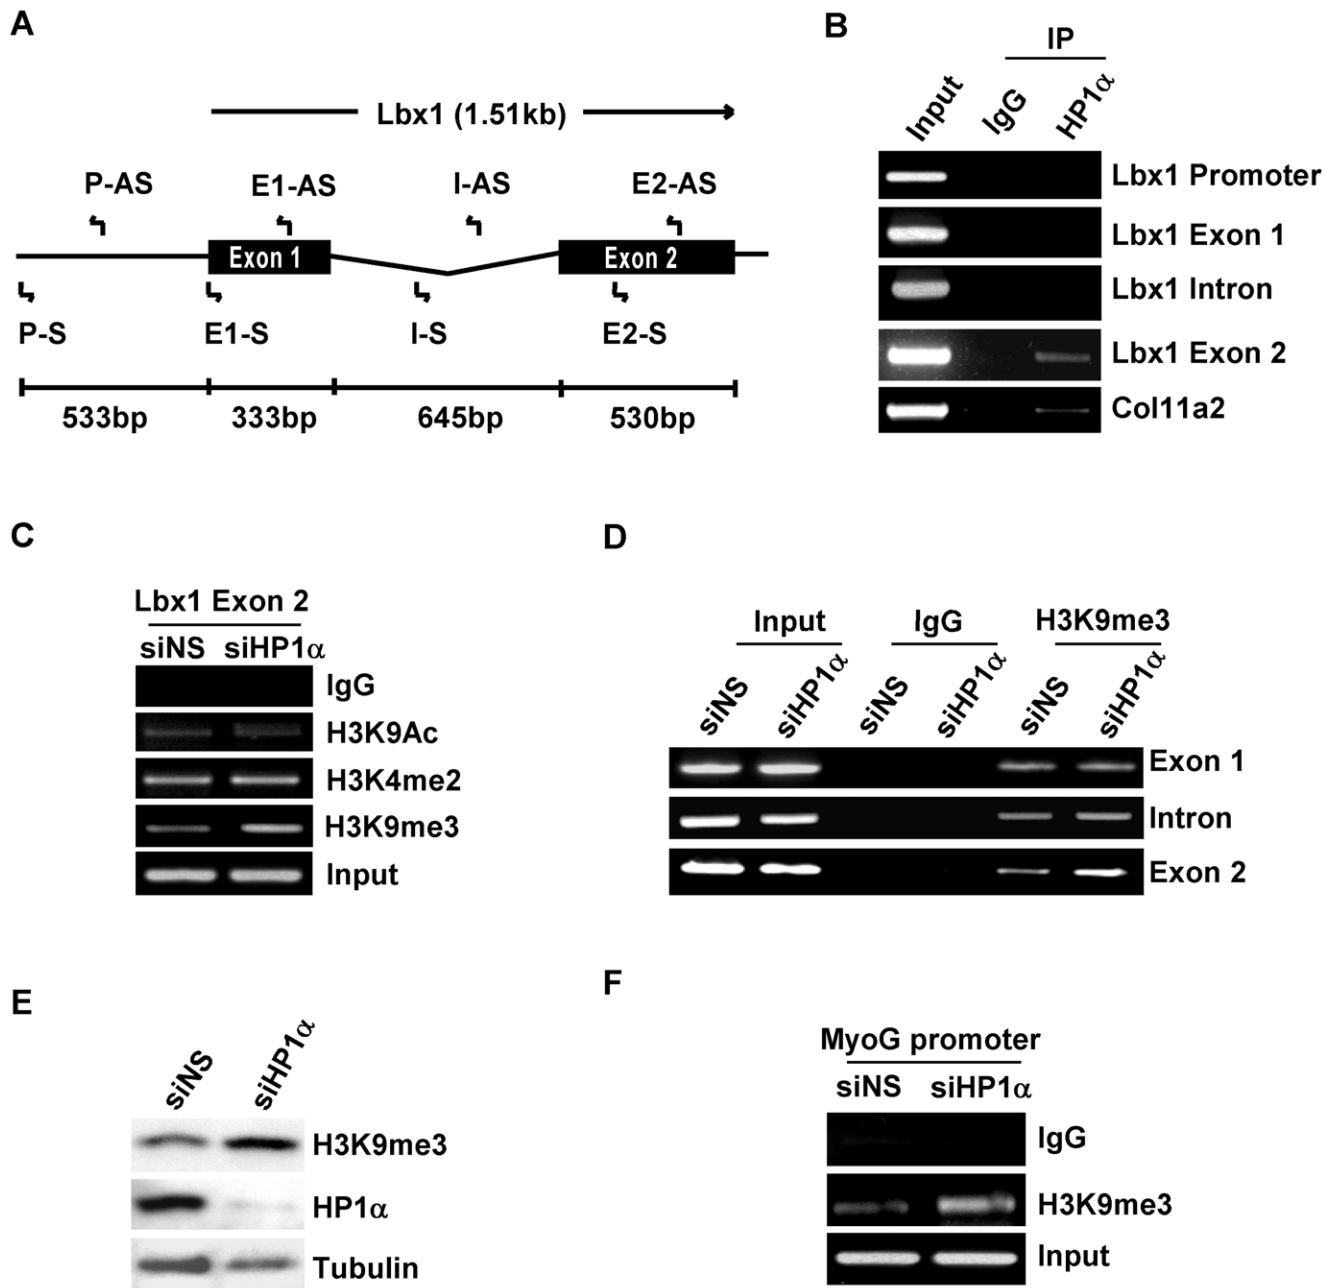

**Figure 5. H3K9me3 levels on myogenic genes increased in C2C12 myoblasts after depleting HP1 $\alpha$ .** A. Schematic diagram of the genomic structure of the mouse *Lbx1* gene and locations of primers used for subsequent ChIP experiments. B. Protein-DNA complexes from cross-linked chromatin extracted from C2C12 myoblasts cultured in GM were immunoprecipitated with HP1 $\alpha$  or mouse IgG. Bound DNA was amplified using the indicated PCR primers. C, D. C2C12 myoblasts were transfected with indicated siRNA, 48 hours after transfection, cross-linked chromatin was extracted and immunoprecipitated with indicated antibodies. *Lbx1* exon 2 (C) or *Lbx1* genomic sequences including exon 1, intron and exon 2 (D) were amplified. E. C2C12 myoblasts were transfected with the indicated siRNA, 48 hours after transfection total cell lysates were subjected to Western blotting with the indicated antibodies. F. C2C12 myoblasts were transfected with indicated siRNA, 48 hours after transfection cross-linked chromatin was extracted and immunoprecipitated with anti-H3K9me3 antibody. Precipitated DNA was used for PCR with primers spanning the MEF2-binding site on the myogenin gene promoter.  
doi:10.1371/journal.pone.0058319.g005

Our study proposes a novel function for HP1 $\alpha$  in maintenance of myogenic gene expression in myoblasts by inhibiting H3K9me3 via interacting with JHDM3A, which is consistent with previous findings that HP1 can activate gene expression in *Drosophila* [9,40]. HP1 $\alpha$  has also been reported to inhibit MEF2-dependent transcription by interacting with MITR and HDAC9 to form a potent transcriptional repressor complex in undifferentiated

myoblasts [12]. Thus the roles of HP1 family members in differentiation are likely complex. HP1 may play multiple, developmentally dependent functions in differentiation, and its positive versus negative transcriptional effects might be determined by interacting partners. The basis for specificity in recruitment of these partners is unknown at this time; however, all three HP1 isoforms can be heavily modified and these posttranslational



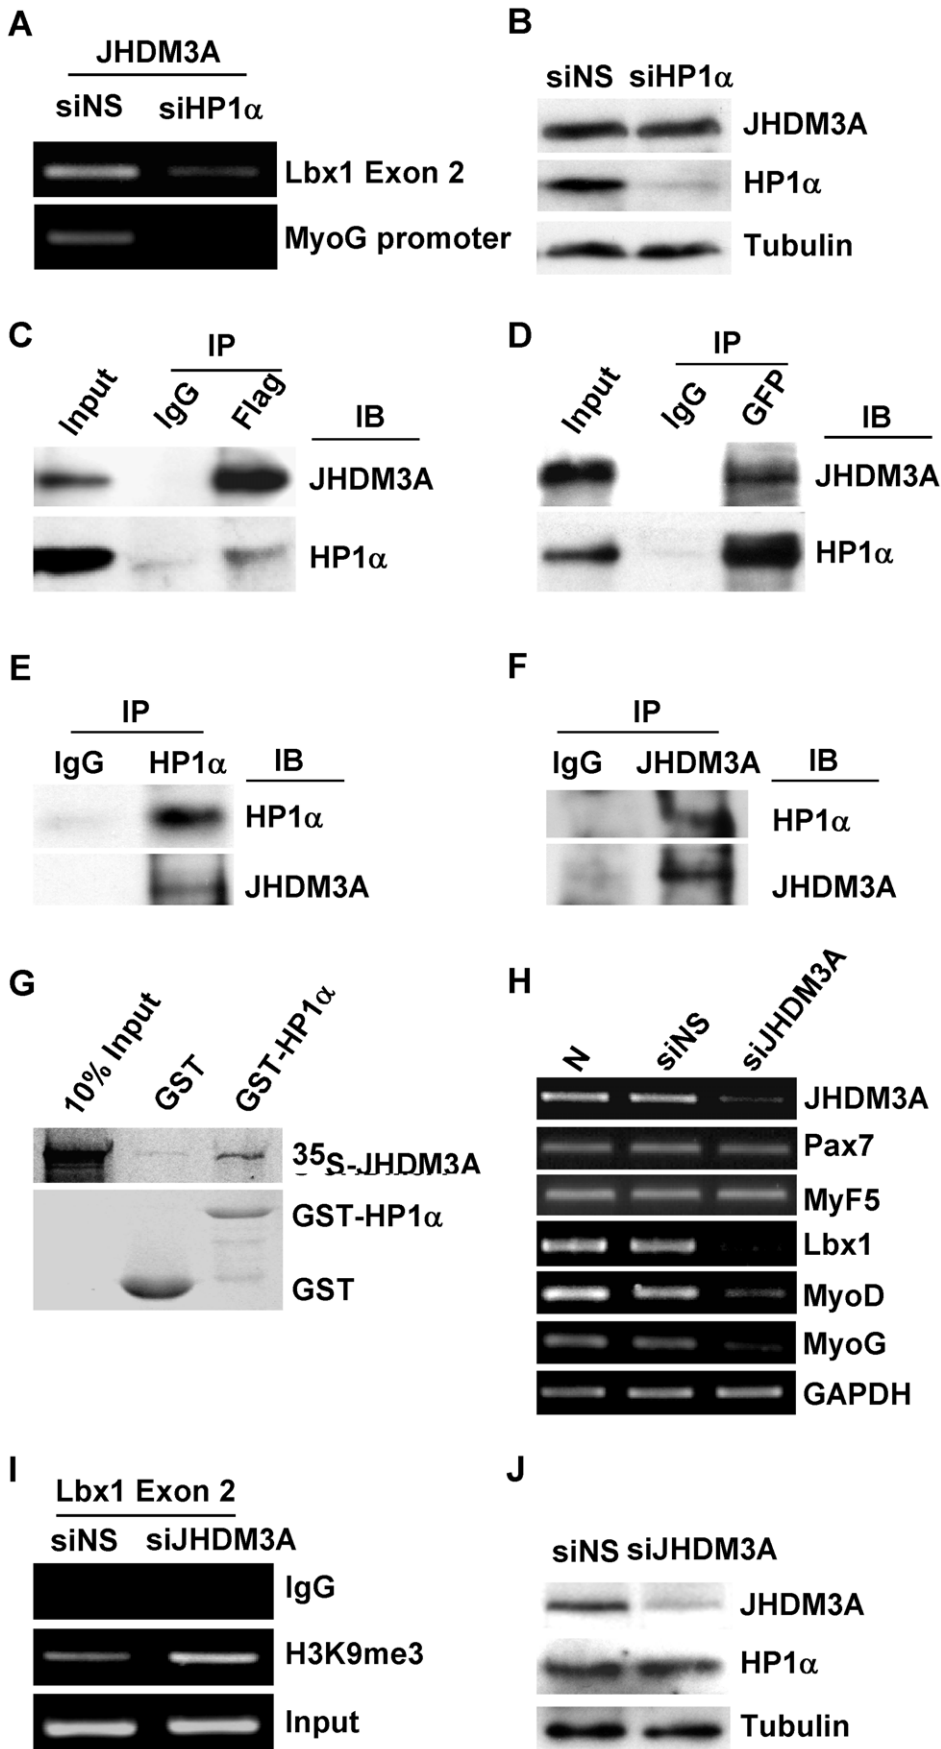

**Figure 6. HP1 $\alpha$  recruits JHDM3A to *Lbx1* gene and knockdown of JHDM3A in myoblasts impairs *Lbx1*, MyoD and myogenin expression.** A. C2C12 myoblasts were transfected with NSsiRNA or HP1 $\alpha$ siRNA, 48 hours after transfection ChIP assay was performed with anti-JHDM3A antibody. *Lbx1* exon 2 and myogenin gene promoter were amplified. B. C2C12 myoblasts were transfected with the indicated siRNA, 48 hours after transfection total cell lysates were subjected to Western blotting with the specified antibodies. C, D Immunoprecipitation (IP) was performed using nuclear extracts prepared from NIH3T3 cells over-expressing Flag-JHDM3A and GFP-HP1 $\alpha$  with either anti-Flag (C) or anti-GFP antibodies (D). Immunoprecipitated complexes were blotted (IB) with indicated antibodies. E, F. Endogenous HP1 and JHDM3A interaction was examined using C2C12 myoblasts nuclear extract. Nuclear extracts were immunoprecipitated with anti-HP1 $\alpha$  (E) or anti-JHDM3A (F) antibody, and western blotted for HP1 $\alpha$  and JHDM3A. G, *In vitro* translated <sup>35</sup>S-JHDM3A protein was incubated with GST or GST-HP1 $\alpha$  immobilized on the glutathione beads. Bound proteins were separated on SDS-PAGE and visualized by autoradiography. H. C2C12 myoblasts cultured in GM were transfected with NSsiRNA or JHDM3AsiRNA. After 48 hours, total RNA was isolated and expression of the indicated genes determined by semiquantitative PCR. I. C2C12 myoblasts were transfected with NSsiRNA or JHDM3AsiRNA, 48 hours after transfection cross-linked chromatin was extracted and immunoprecipitated with anti-H3K9me3 antibody. *Lbx1* exon 2 genomic sequences were amplified. J. C2C12 myoblasts were transfected with the indicated siRNA, 48 hours after transfection total cell lysates were subjected to Western blotting with the specified antibodies. doi:10.1371/journal.pone.0058319.g006

modifications might modulate HP1 interactions with silencing and antisilencing proteins [41]. Additionally, both HP1 and JHDM3A proteins levels are regulated during myogenic differentiation (Fig. 1A and Fig. S5B). Clearly epigenetic regulation and post-translational modifications of histone play an important role in skeletal muscle differentiation and it will be important to better understand the complex regulation of these factors.

## Materials and Methods

### Cell Culture and Plasmids

Mouse C2C12 cells (ATCC) were propagated as myoblasts in DMEM containing 10% fetal bovine serum (Growth Medium, GM) and 1% penicillin G and streptomycin sulfate (Invitrogen) at 37°C in a humidified 5% CO<sub>2</sub> incubator and induced to differentiate using DMEM containing 2% horse serum (Differentiation medium, DM). NIH3T3 cells were grown in DMEM containing 10% NCS and 1% penicillin G and streptomycin sulfate. pLPC-EHGF-HP1 $\alpha$  was kindly provided by Dr. Scott Lowe from Cold Spring Laboratories. pCDNA3-Flag-JHDM3A was kindly provided by Dr. Yi Zhang from Howard Hughes Medical Institute. The plasmid containing the siRNA resistant version of HP1 $\alpha$  was generated via a site-directed mutagenesis kit (Stratagene) using pLPC-EHGF-HP1 $\alpha$  as a template. To evade RNA silencing, four nucleotides within the HP1 $\alpha$  siRNA target sequence were mutated. This mutation (TTTTCT to TTCAGC) does not change the encoded amino acids.

### Immunostaining

C2C12 cells were fixed with 4% paraformaldehyde and immunostained with antibodies to HP1 $\alpha$  (15.19s2, Upstate Biotech, Inc.), HP1 $\beta$  (MAB3448, Chemicon), HP1 $\gamma$  (MAB3450, Chemicon), Sarcomeric myosin heavy chain (Developmental Hybridoma Studies Bank), GFP (Santa Cruz) and Troponin C (Santa Cruz). Cells were counter-stained with DAPI and Phallotoxins (Molecular Probes).

### RNA and Protein Analysis

Total RNA was isolated from C2C12 cells using Tri Reagent (Sigma). Semi-quantitative RT-PCR was performed as described [42]. Primers sequences are available upon request. Western blotting and immunoprecipitation were performed according to standard procedures. Nuclear extracts were prepared as described [43]. Antibodies to HP1 $\alpha$  (Upstate Biotech, Inc.), HP1 $\beta$  (MAB3448, Chemicon), HP1 $\gamma$  (MAB3450, Chemicon), Myogenin (F5D, BD Biosciences),  $\alpha$ -skeletal actinin (Sigma), phospho-Histone (Ser10) (Upstate Biotech, Inc.), Tubulin (Sigma), GFP (Abcam), Flag (Sigma), CDC2, p21, JHDM3A (Bethyl laboratories) and Laminin B (Santa Cruz Biotech) were purchased commercially. *In vitro* binding assays were performed according

to standard procedures as described [44]. pGEX-KG-HP1 $\alpha$  was kindly provided by Dr. Eric N. Olson.

### RNA Interference

C2C12 cells were transfected with 100 nM of HP1 $\alpha$ siRNA (ID# 60497 or ID# 60593 Ambion, ID# 60497 was used unless otherwise noted), HP1 $\beta$ siRNA (ID# 160032, Ambion), HP1 $\gamma$ siRNA (ID# 160038, Ambion), JHDM3AsiRNA (Cat# SI00241003 Qiagen) or nonspecific siRNA (Cat# 1027310, Qiagen) was transfected into cells using Lipofectamin 2000 (Qiagen).

### Chromatin Immunoprecipitation (ChIP) and Real-time Quantitative PCR

PCR-ChIP analysis was performed as described [44]. Chromatin was incubated at 4°C overnight with antibodies specific to HP1 $\alpha$  (Upstate Biotech, Inc.), H3K9me3 (Upstate Biotech, Inc.), H3K9Ac (Upstate Biotech, Inc.), H3K4me2 (Upstate Biotech, Inc.) and JHDM3A (Bethyl Lab. Inc), normal mouse or rabbit IgG was used as control. PCR was performed using Platinum Taq polymerase (Invitrogen). The following pairs of primers were used for PCR: *Lbx1* putative promoter: P-S (AGGAGAAAGAAGG-GAGAGCGAAGA), P-AS (ATTTAAAGGTGT-CAGGTGGCTCCG) *Lbx1* Exon 1: E1-S (5'-AAACGAGGCC-GAGATGACTTCCAA-3'), E1-AS (5'-AGAGAGGCGAGGTCTGCGA-3'); *Lbx1* intron: I-S (5'-TCCGCTTGGACTCTCCTAGACTTA-3'), I-AS (5'-CACAGAGTGCAAGGAAACCACACA-3'); *Lbx1* Exon 2: E2-S (5'-TCGTGCGGAGCATACTGTCATT-3'), E2-AS (5'-TGATGACCTGTGCATTGGTGAGG -3'); for *Coll1a2*: C1 (5'-GGATGCTGCCACGGCCTGAGG-3'), C2 (5'-GGGTCTGCCAGGAGCCTGTGG-3') [24], for myogenin promoter: [+](5'-GAATCACATGTAATCCACTGGA-3'); [-](5'-ACGCCAACTGCTGGGTGCCA-3') [45]. Immunoprecipitated DNA from three independent ChIP analyses with anti-H3K9me3 antibody was subjected to real-time quantitative PCR in triplicate. Real-time quantitative PCR was conducted using the ABI PRISM 7700 Sequence Detection System; Taqman (Applied Biosystems, Foster City, CA). PCR amplicons were detected by fluorescent detection of SYBR Green (QuantiTect SYBR Green PCR Kit, Qiagen). Primers sequence for *Lbx1* Exon 2 is listed above.

### BrdU Incorporation Assay

C2C12 cells were incubated in DM for 72 hours and transfected with 100 nM oligonucleotide siRNAs. 24 hours after transfection, cells were cultured with DMEM containing 20% FBS in the presence of BrdU labeling reagent. Then cells were subjected to BrdU (Roche) and sarcomeric myosin heavy chain immunofluorescent staining, nuclei were counter-stained with DAPI according to the manufacturer's instructions.

## EDU Cell Proliferation Assay

EDU (5-ethynyl-2'-deoxyuridine) assay were performed using Click-iT<sup>®</sup> EdU HCS Assays (Invitrogen). C2C12 cells were seeded at a density of  $4 \times 10^4$  cells/well on 24-well plate containing cover slips and cultured with 10% FBS DMEM overnight. And then transfected with 100 nM oligonucleotide siRNAs. 24 hours after transfection, cells are incubated with 10  $\mu$ M EDU for 4 hr. The cells which incorporated EDU were stained following the manufacture's instruction.

## Supporting Information

**Figure S1 Confocal fluorescence microscopy was performed on C2C12 myoblasts and myotubes after immunostaining for the indicated HP1 protein (green) and DAPI (converted to red).**

(PDF)

**Figure S2 C2C12 myoblasts were treated with EDU after indicated siRNA transfection.** The cells were then fixed and stained for EDU incorporation and HP1 $\alpha$  expression. Nuclei were visualized by DAPI staining.

(PDF)

**Figure S3 C2C12 myoblasts were co-transfected with indicated siRNA and GFP-expressing plasmid.** GFP-expressing cells were isolated by FACS. Staining with 7-AAD was performed to exclude dead cells.

(PDF)

## References

- Sabourin LA, Rudnicki MA (2000) The molecular regulation of myogenesis. *Clin Genet* 57: 16–25.
- Molkentin JD, Olson EN (1996) Defining the regulatory networks for muscle development. *Curr Opin Genet Dev* 6: 445–453.
- Yun K, Wold B (1996) Skeletal muscle determination and differentiation: story of a core regulatory network and its context. *Curr Opin Cell Biol* 8: 877–889.
- Ait-Si-Ali S, Guasconi V, Fritsch L, Yahi H, Sekhri R, et al. (2004) A *Suv39h*-dependent mechanism for silencing S-phase genes in differentiating but not in cycling cells. *Embo J* 23: 605–615.
- Forcales SV, Puri PL (2005) Signaling to the chromatin during skeletal myogenesis: novel targets for pharmacological modulation of gene expression. *Semin Cell Dev Biol* 16: 596–611.
- Bernstein BE, Meissner A, Lander ES (2007) The mammalian epigenome. *Cell* 128: 669–681.
- Minc E, Allory Y, Courvalin JC, Buendia B (2001) Immunolocalization of HP1 proteins in metaphasic mammalian chromosomes. *Methods Cell Sci* 23: 171–174.
- Minc E, Allory Y, Worman HJ, Courvalin JC, Buendia B (1999) Localization and phosphorylation of HP1 proteins during the cell cycle in mammalian cells. *Chromosoma* 108: 220–234.
- Piacentini L, Fanti L, Berloco M, Perrini B, Pimpinelli S (2003) Heterochromatin protein 1 (HP1) is associated with induced gene expression in *Drosophila* euchromatin. *J Cell Biol* 161: 707–714.
- James TC, Eissenberg JC, Craig C, Dietrich V, Hobson A, et al. (1989) Distribution patterns of HP1, a heterochromatin-associated nonhistone chromosomal protein of *Drosophila*. *Eur J Cell Biol* 50: 170–180.
- Hwang KK, Eissenberg JC, Worman HJ (2001) Transcriptional repression of euchromatic genes by *Drosophila* heterochromatin protein 1 and histone modifiers. *Proc Natl Acad Sci U S A* 98: 11423–11427.
- Zhang CL, McKinsey TA, Olson EN (2002) Association of class II histone deacetylases with heterochromatin protein 1: potential role for histone methylation in control of muscle differentiation. *Mol Cell Biol* 22: 7302–7312.
- Cammas F, Herzog M, Lerouge T, Chambon P, Losson R (2004) Association of the transcriptional corepressor TIF1 $\beta$  with heterochromatin protein 1 (HP1): an essential role for progression through differentiation. *Genes Dev* 18: 2147–2160.
- Panteliev I, Boutillier S, Sec V, Spiller DG, Rouaux C, et al. (2007) HP1 $\alpha$  guides neuronal fate by timing E2F-targeted genes silencing during terminal differentiation. *Embo J* 26: 3616–3628.
- Agarwal N, Hardt T, Brero A, Nowak D, Rothbauer U, et al. (2007) McCP2 interacts with HP1 and modulates its heterochromatin association during myogenic differentiation. *Nucleic Acids Res* 35: 5402–5408.
- Yahi H, Fritsch L, Philipot O, Guasconi V, Souidi M, et al. (2008) Differential Cooperation between Heterochromatin Protein HP1 Isoforms and MyoD in Myoblasts. *J Biol Chem* 283: 23692–23700.
- Feldman N, Gerson A, Fang J, Li E, Zhang Y, et al. (2006) G9a-mediated irreversible epigenetic inactivation of Oct-3/4 during early embryogenesis. *Nat Cell Biol* 8: 188–194.
- Brero A, Easwaran HP, Nowak D, Grunewald I, Cremer T, et al. (2005) Methyl CpG-binding proteins induce large-scale chromatin reorganization during terminal differentiation. *J Cell Biol* 169: 733–743.
- McDowell TL, Gibbons RJ, Sutherland H, O'Rourke DM, Bickmore WA, et al. (1999) Localization of a putative transcriptional regulator (ATRX) at pericentromeric heterochromatin and the short arms of acrocentric chromosomes. *Proc Natl Acad Sci U S A* 96: 13983–13988.
- Lee H, Habas R, Abate-Shen C (2004) MSX1 cooperates with histone H1b for inhibition of transcription and myogenesis. *Science* 304: 1675–1678.
- Schafer K, Braun T (1999) Early specification of limb muscle precursor cells by the homeobox gene *Lbx1h*. *Nat Genet* 23: 213–216.
- Gross MK, Moran-Rivard L, Velasquez T, Nakatsu MN, Jagla K, et al. (2000) *Lbx1* is required for muscle precursor migration along a lateral pathway into the limb. *Development* 127: 413–424.
- Mennerich D, Braun T (2001) Activation of myogenesis by the homeobox gene *Lbx1* requires cell proliferation. *Embo J* 20: 7174–7183.
- Ayanathan K, Lechner MS, Bell P, Maul GG, Schultz DC, et al. (2003) Regulated recruitment of HP1 to a euchromatic gene induces mitotically heritable, epigenetic gene silencing: a mammalian cell culture model of gene variegation. *Genes Dev* 17: 1855–1869.
- de Wit E, Greif F, van Steensel B (2007) High-resolution mapping reveals links of HP1 with active and inactive chromatin components. *PLoS Genet* 3: e38.
- Tsukada Y, Fang J, Erdjument-Bromage H, Warren ME, Borchers CH, et al. (2006) Histone demethylation by a family of JmjC domain-containing proteins. *Nature* 439: 811–816.
- Yamane K, Toumazou C, Tsukada Y, Erdjument-Bromage H, Tempst P, et al. (2006) JHDM2A, a JmjC-containing H3K9 demethylase, facilitates transcription activation by androgen receptor. *Cell* 125: 483–495.
- Klose RJ, Yamane K, Bae Y, Zhang D, Erdjument-Bromage H, et al. (2006) The transcriptional repressor JHDM3A demethylates trimethyl histone H3 lysine 9 and lysine 36. *Nature* 442: 312–316.
- Novitsch BG, Mulligan GJ, Jacks T, Lassar AB (1996) Skeletal muscle cells lacking the retinoblastoma protein display defects in muscle gene expression and accumulate in S and G2 phases of the cell cycle. *J Cell Biol* 135: 441–456.
- Zacksenhaus E, Jiang Z, Chung D, Marth JD, Phillips RA, et al. (1996) pRb controls proliferation, differentiation, and death of skeletal muscle cells and other lineages during embryogenesis. *Genes Dev* 10: 3051–3064.

**Figure S4 C2C12 cells were transfected with nonspecific siRNA (siNA) or HP1 $\alpha$ siRNA (siHP1 $\alpha$ ).** 48 hours after transfection Chip assay was performed with anti-H3K9me3 (A) or anti-JHDM3A antibody (B). H3K9me3 levels (A) and presence of JHDM3A (B) at *Lbx1* exon 2 were quantified by Real time PCR. \*P<0.01 for siNS transfected cells versus siHP1 $\alpha$  transfected cells.

(PDF)

**Figure S5 A.** C2C12 cells were transfected with nonspecific siRN or JHDM3A siRNA. Total RNA was isolated at indicated time points after transfection. Semiquantitative PCR analysis of gene expression was performed. **B.** Western blotting was performed with indicated antibodies on whole proteins extracted from C2C12 myoblasts (MB) and myotubes (MT).

(PDF)

## Acknowledgments

We are grateful to Drs. Scott Lowe, Yi Zhang, and Eric N. Olson for the indicated plasmids and helpful discussions of Dr. Scott John and Josh Black. We thank Dr. Ana B. Roper for technical assistance.

## Author Contributions

Conceived and designed the experiments: PS WRM. Performed the experiments: PS KO EA SSC KSL. Analyzed the data: PS KO EA KSL WRM. Contributed reagents/materials/analysis tools: WRM. Wrote the paper: PS WRM.

31. Novitsch BG, Spicer DB, Kim PS, Cheung WL, Lassar AB (1999) pRb is required for MEF2-dependent gene expression as well as cell-cycle arrest during skeletal muscle differentiation. *Curr Biol* 9: 449–459.
32. Camarda G, Siepi F, Pajalunga D, Bernardini C, Rossi R, et al. (2004) A pRb-independent mechanism preserves the postmitotic state in terminally differentiated skeletal muscle cells. *J Cell Biol* 167: 417–423.
33. Huh MS, Parker MH, Scime A, Parks R, Rudnicki MA (2004) Rb is required for progression through myogenic differentiation but not maintenance of terminal differentiation. *J Cell Biol* 166: 865–876.
34. Yamano S, Dai J, Moursi AM Comparison of transfection efficiency of nonviral gene transfer reagents. *Mol Biotechnol* 46: 287–300.
35. McKinnell IW, Ishibashi J, Le Grand F, Punch VG, Addicks GC, et al. (2008) Pax7 activates myogenic genes by recruitment of a histone methyltransferase complex. *Nat Cell Biol* 10: 77–84.
36. Barski A, Cuddapah S, Cui K, Roh TY, Schones DE, et al. (2007) High-resolution profiling of histone methylations in the human genome. *Cell* 129: 823–837.
37. Bannister AJ, Zegerman P, Partridge JF, Miska EA, Thomas JO, et al. (2001) Selective recognition of methylated lysine 9 on histone H3 by the HP1 chromo domain. *Nature* 410: 120–124.
38. Zofall M, Grewal SI (2006) Swi6/HP1 recruits a JmjC domain protein to facilitate transcription of heterochromatic repeats. *Mol Cell* 22: 681–692.
39. Lin CH, Li B, Swanson S, Zhang Y, Florens L, et al. (2008) Heterochromatin protein 1a stimulates histone H3 lysine 36 demethylation by the *Drosophila* KDM4A demethylase. *Mol Cell* 32: 696–706.
40. Wakimoto BT (1998) Beyond the nucleosome: epigenetic aspects of position-effect variegation in *Drosophila*. *Cell* 93: 321–324.
41. Lomber G, Bensi D, Fernandez-Zapico ME, Urrutia R (2006) Evidence for the existence of an HP1-mediated subcode within the histone code. *Nat Cell Biol* 8: 407–415.
42. Angelis E, Garcia A, Chan SS, Schenke-Layland K, Ren S, et al. (2008) A cyclin D2-Rb pathway regulates cardiac myocyte size and RNA polymerase III after biomechanical stress in adult myocardium. *Circ Res* 102: 1222–1229.
43. Gordon JA (1991) Use of vanadate as protein-phosphotyrosine phosphatase inhibitor. *Methods Enzymol* 201: 477–482.
44. MacLellan WR, Xiao G, Abdellatif M, Schneider MD (2000) A novel Rb- and p300-binding protein inhibits transactivation by MyoD. *Mol Cell Biol* 20: 8903–8915.
45. Lu J, McKinsey TA, Zhang CL, Olson EN (2000) Regulation of skeletal myogenesis by association of the MEF2 transcription factor with class II histone deacetylases. *Mol Cell* 6: 233–244.
