# Supplementary material for: Epigenetic Regulation of Myogenic Gene Expression by Heterochromatin Protein 1 Alpha
Source: PubMed Central journal article supplement (PMC3594309; doi:10.1371/journal.pone.0058319), 2013-03-11
Supplement: pone.0058319.s001.pdf [file pone.0058319.s001.pdf]

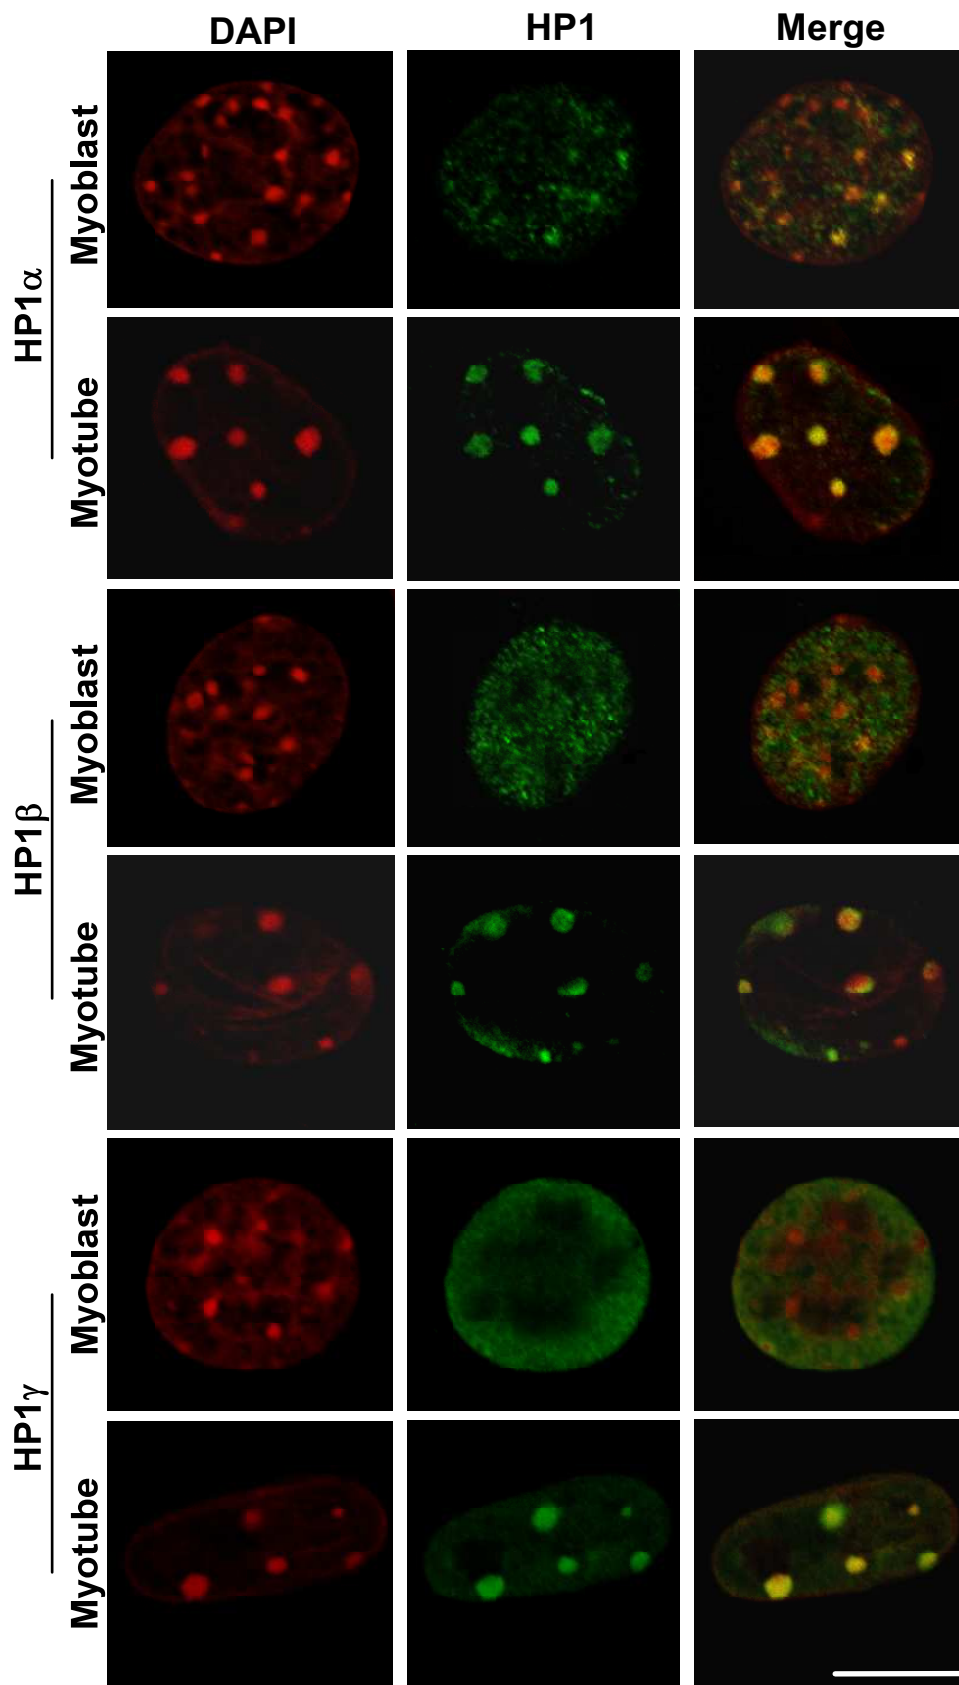

Fig. S1. Confocal fluorescence microscopy was performed on C2C12 myoblasts and myotubes after immunostaining for the indicated HP1 protein (green) and DAPI (converted to red). Scale bar equals 10 $\mu$ m.

Fig. S1 Sdek et al
