# Supplementary material for: Epigenetic Regulation of Myogenic Gene Expression by Heterochromatin Protein 1 Alpha
Source: PubMed Central journal article supplement (PMC3594309; doi:10.1371/journal.pone.0058319), 2013-03-11
Supplement: pone.0058319.s002.pdf [file pone.0058319.s002.pdf]

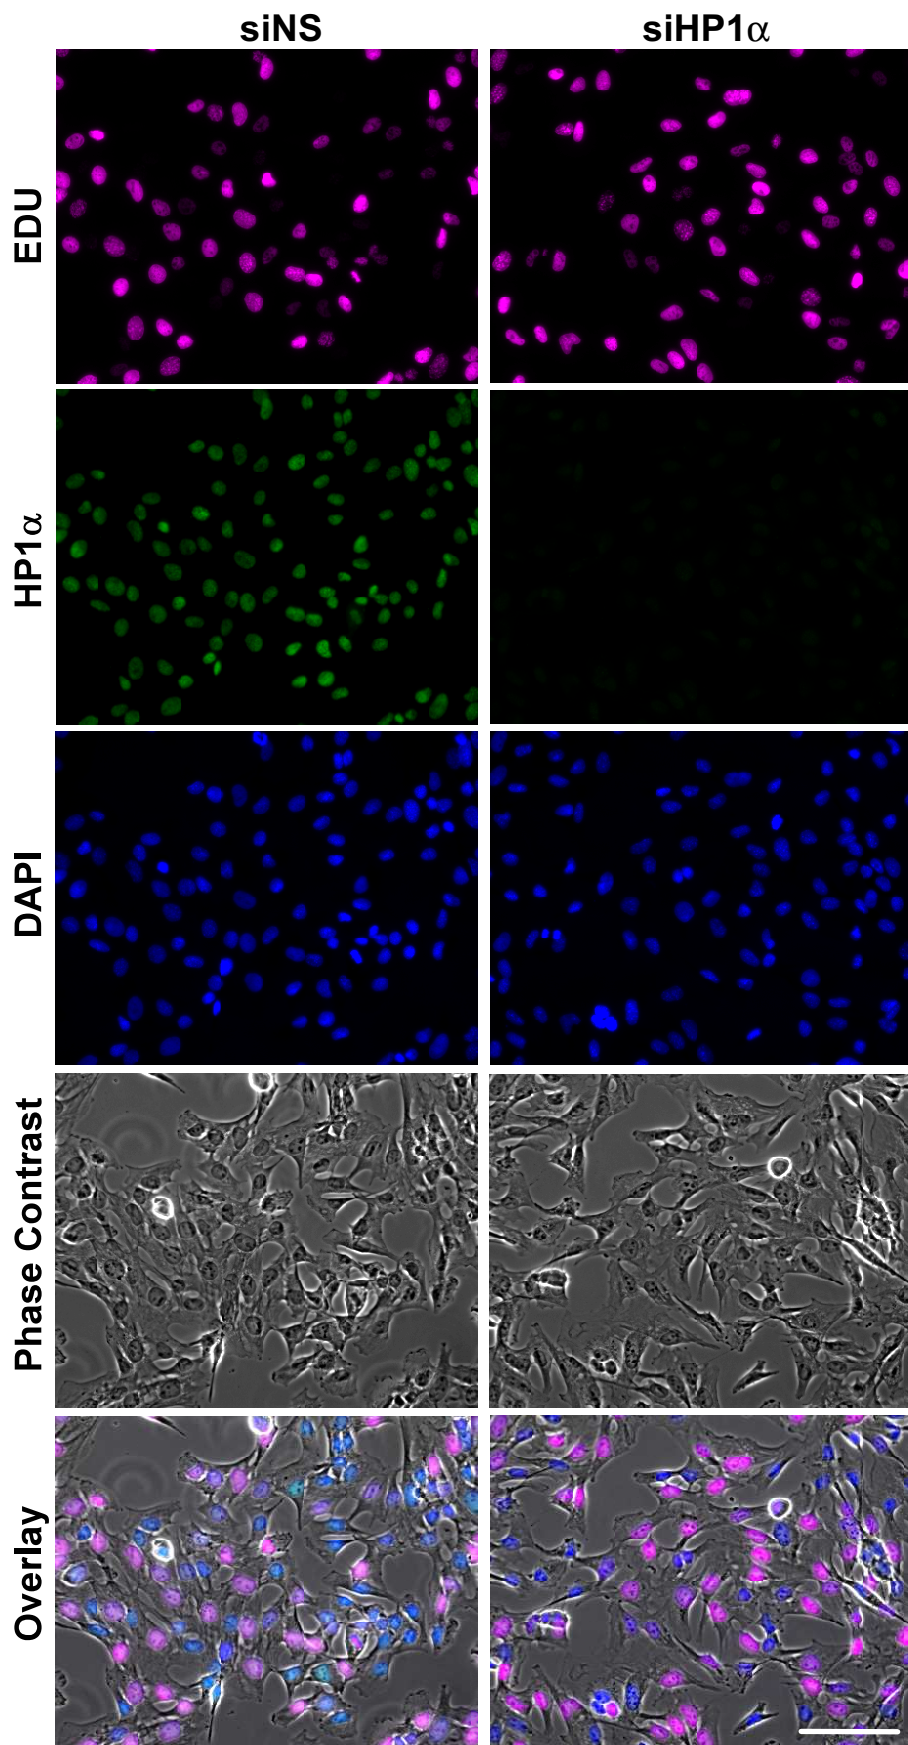

**Fig. S2 C2C12 myoblasts** were treated with EDU after indicated siRNA transfection. The cells were then fixed and stained for EDU incorporation and HP1 $\alpha$  expression. Nuclei were visualized by DAPI staining. Scale bar: 100 $\mu$ m

Fig. S2 Sdek et al
