# Supplementary material for: Epigenetic Regulation of Myogenic Gene Expression by Heterochromatin Protein 1 Alpha
Source: PubMed Central journal article supplement (PMC3594309; doi:10.1371/journal.pone.0058319), 2013-03-11
Supplement: pone.0058319.s003.pdf [file pone.0058319.s003.pdf]

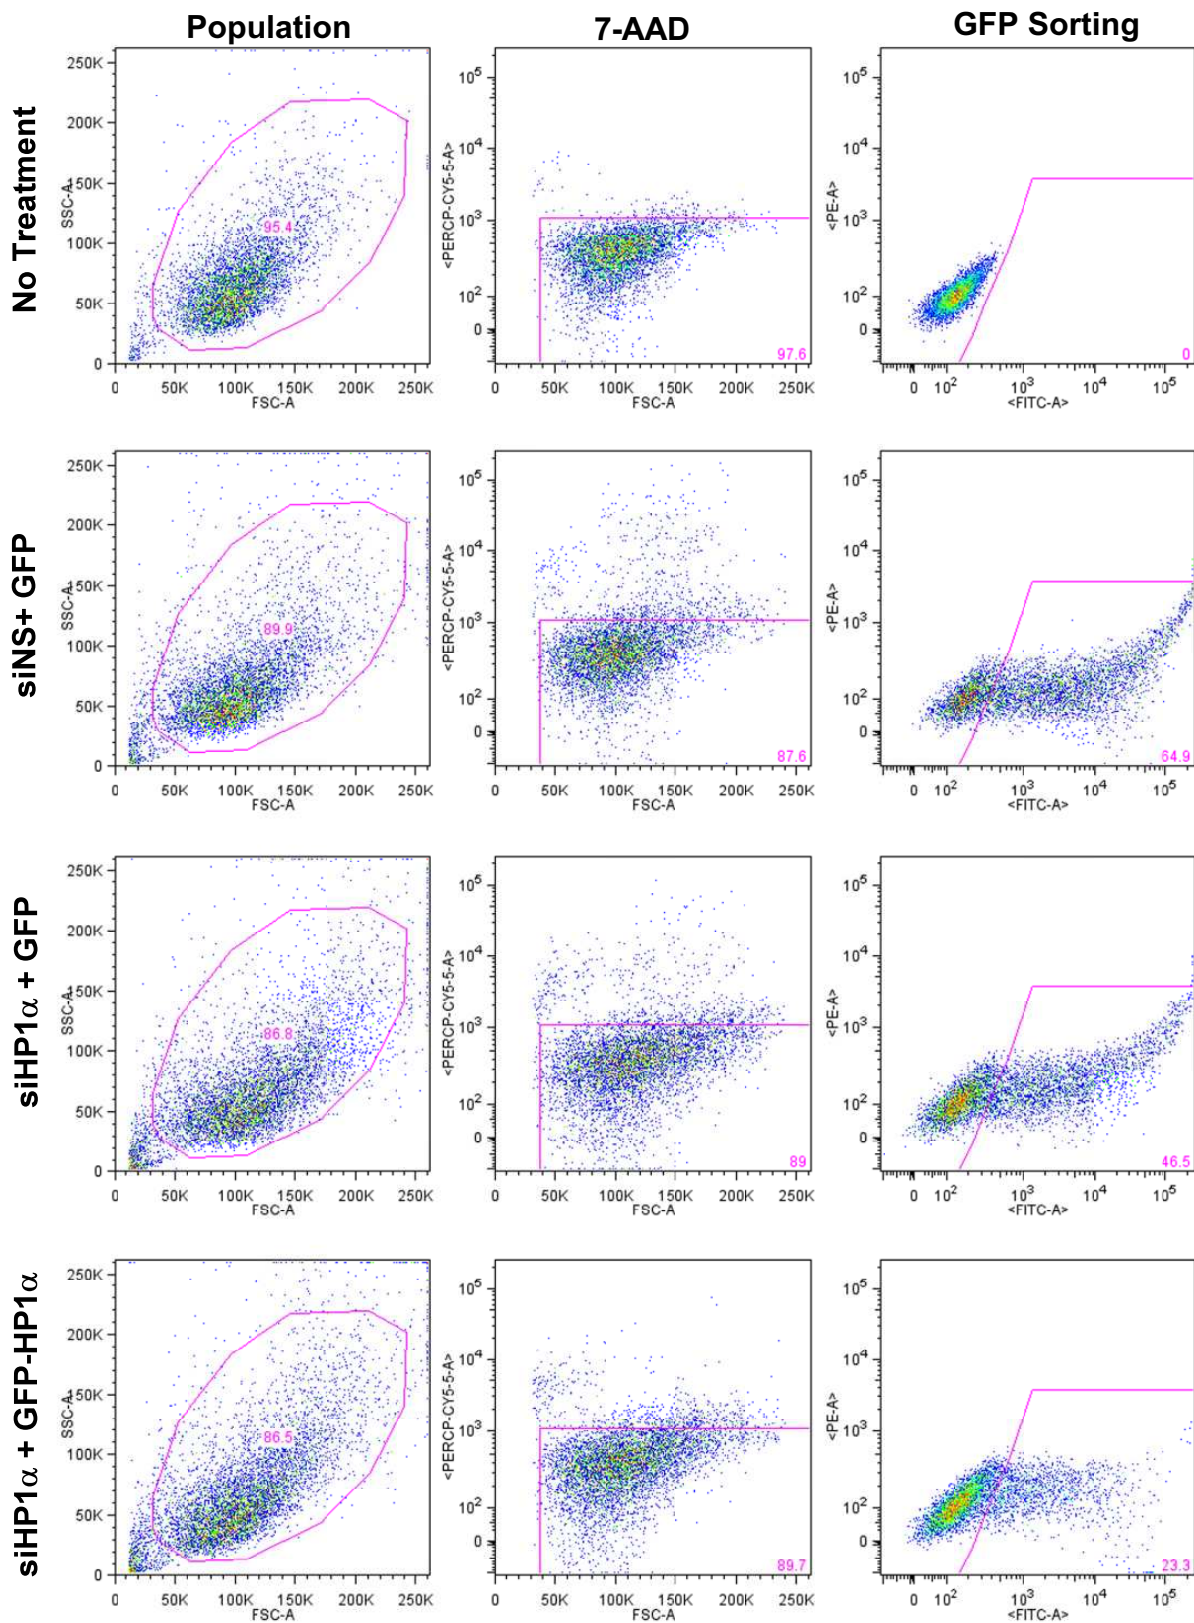

**Fig. S3 C2C12 myoblasts were co-transfected with indicated siRNA and GFP-expressing plasmid. GFP-expressing cells were isolated by FACS. Staining with 7-AAD was performed to exclude dead cells.**

**Fig. S3 Sdek et al**
