# Supplementary material for: Epigenetic Regulation of Myogenic Gene Expression by Heterochromatin Protein 1 Alpha
Source: PubMed Central journal article supplement (PMC3594309; doi:10.1371/journal.pone.0058319), 2013-03-11
Supplement: pone.0058319.s005.pdf [file pone.0058319.s005.pdf]

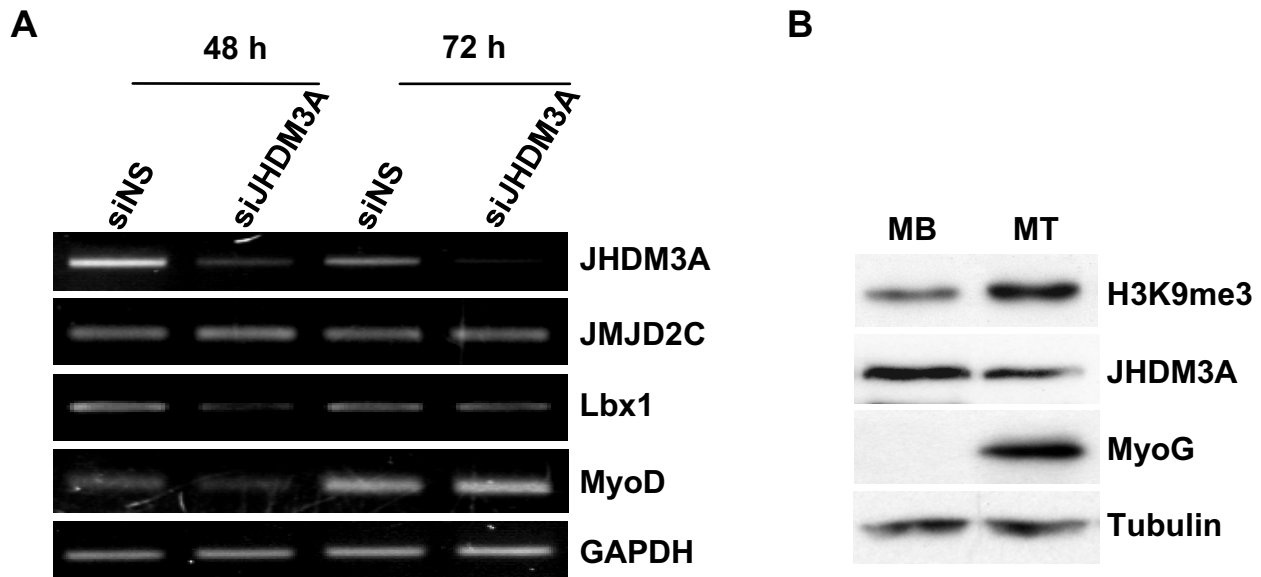

**Fig. S5 A.** C2C12 cells were transfected with nonspecific siRNA or JHDM3AsiRNA. Total RNA was isolated at indicated time points after transfection. Semiquantitative PCR analysis of gene expression was performed. **B.** Western blotting was performed with indicated antibodies on whole proteins extracted from C2C12 myoblasts (MB) and myotubes (MT).

**Fig. S5 Sdek et al**
